# Supplementary material for: Constructing extreme heatwave storylines with differentiable climate models
Source: Copernicus journal article supplement (doi:10.5194/wcd-7-393-2026), 2026-02-19
Supplement: Supplementary file 1 [file wcd-7-393-2026-supplement.pdf]

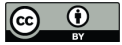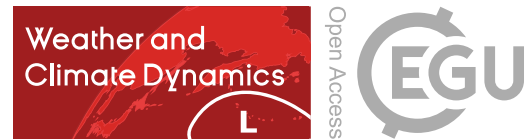

*Supplement of*

## **Constructing extreme heatwave storylines with differentiable climate models**

**Tim Whittaker and Alejandro Di Luca**

*Correspondence to:* Tim Whittaker ([whittaker.tim@courrier.uqam.ca](mailto:whittaker.tim@courrier.uqam.ca))

The copyright of individual parts of the supplement might differ from the article licence.

## S1 Temperature at 850hPa

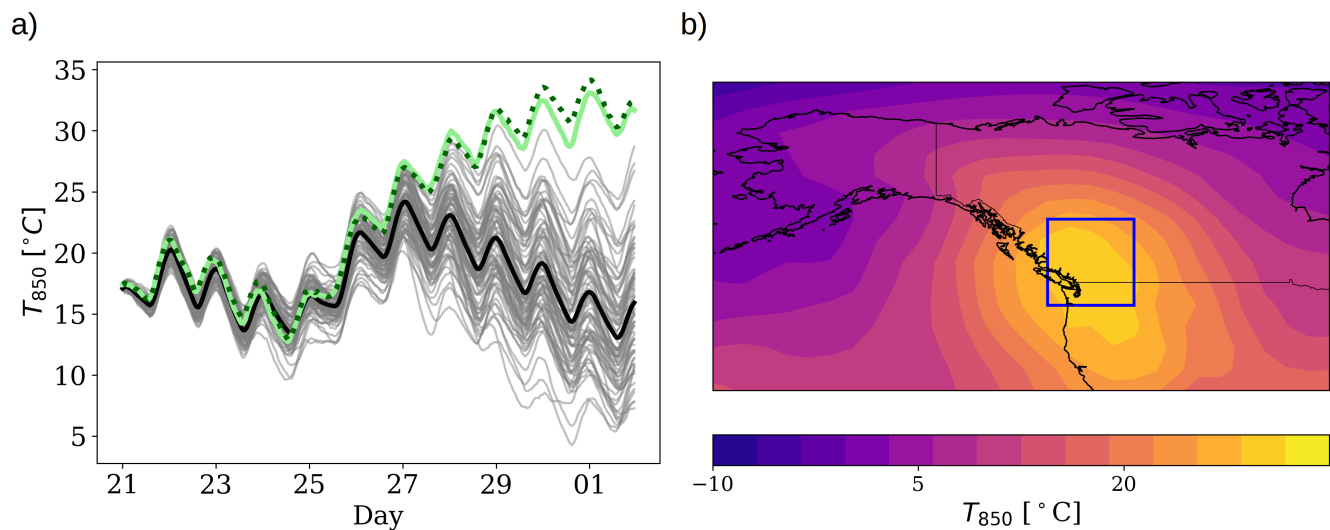

**Figure S1.** Over elevated terrain such as the Canadian Rockies, the 1000 hPa surface is often below ground level. To ensure physically meaningful temperatures across the domain, we also analyze  $T_{850}$ . Despite optimization targeting  $T_{1000}$ , anomalies at 850 hPa exceed ensemble values, though with smaller magnitude. (a) Time series of  $T_{850}$  for EXP50, EXP75, and the ensemble. (b) Spatial map of  $T_{850}$  anomalies from EXP75.

## S2 Perturbation Maps

### Spatial Distribution: Geopotential

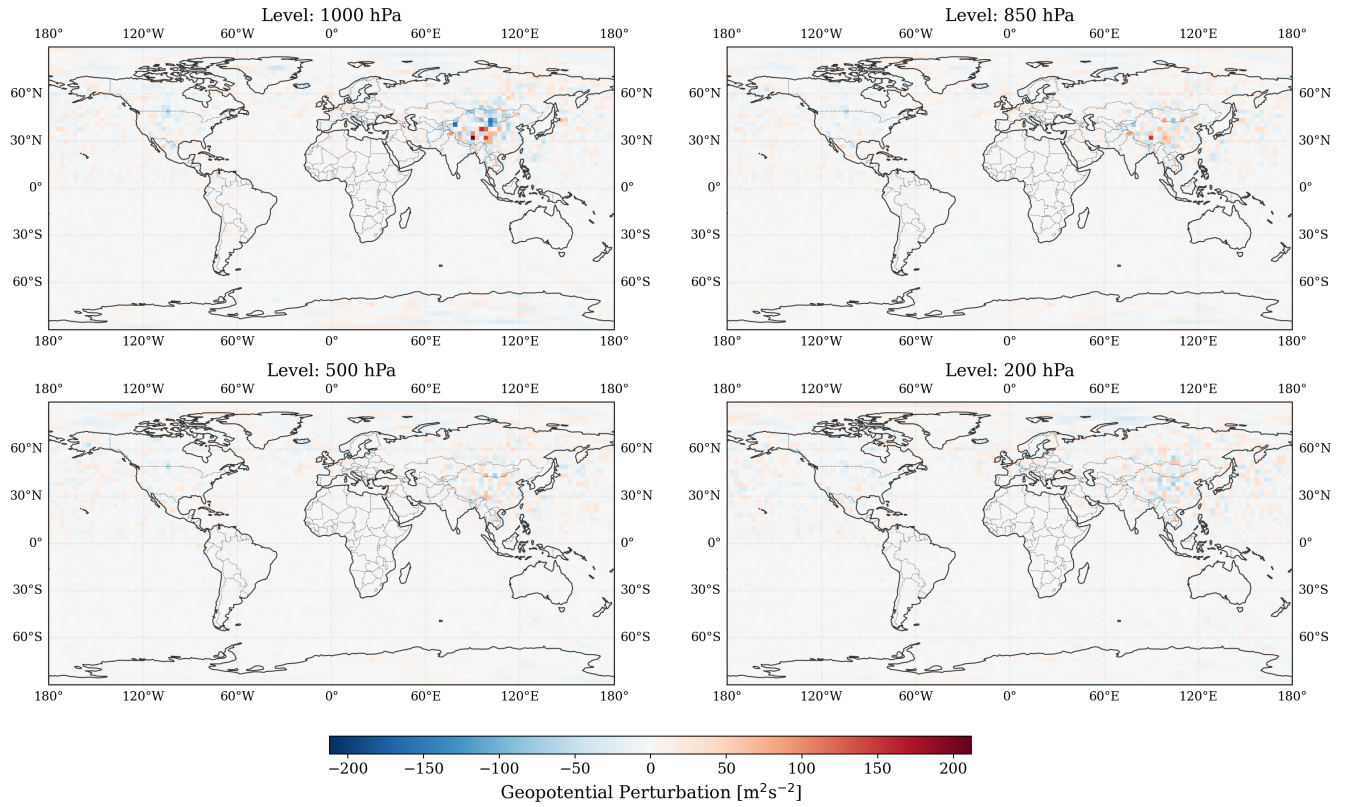

**Figure S2.** Spatial distribution of initial condition perturbations in geopotential height at four pressure levels (1000, 850, 500, and 200 hPa). The perturbations are primarily concentrated over Asia with lower levels having stronger perturbations

### Spatial Distribution: Kinetic Energy

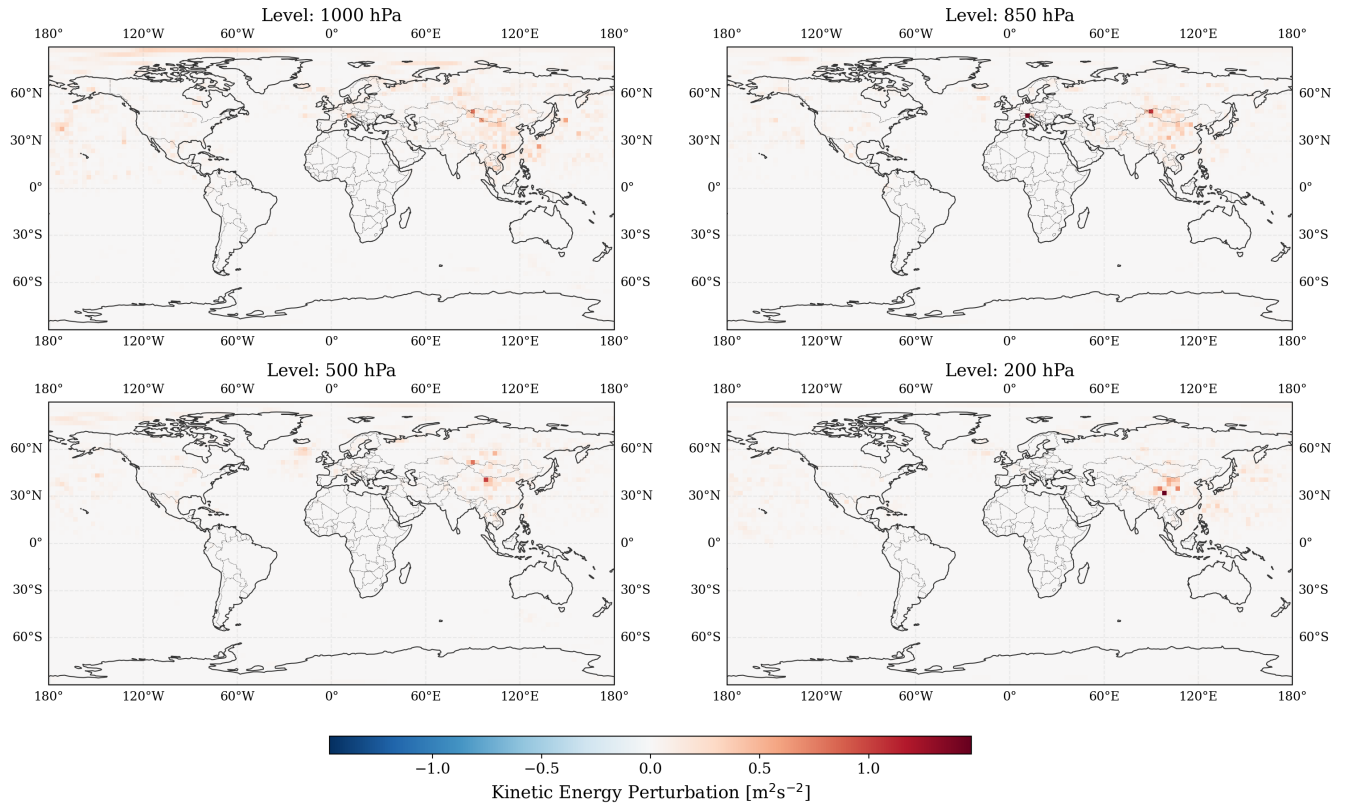

**Figure S3.** Spatial distribution of initial condition perturbations in kinetic energy at four pressure levels (1000, 850, 500, and 200 hPa). The perturbations are primarily concentrated over Asia with similar strengths of perturbations at all model levels.

### Spatial Distribution: Specific Humidity

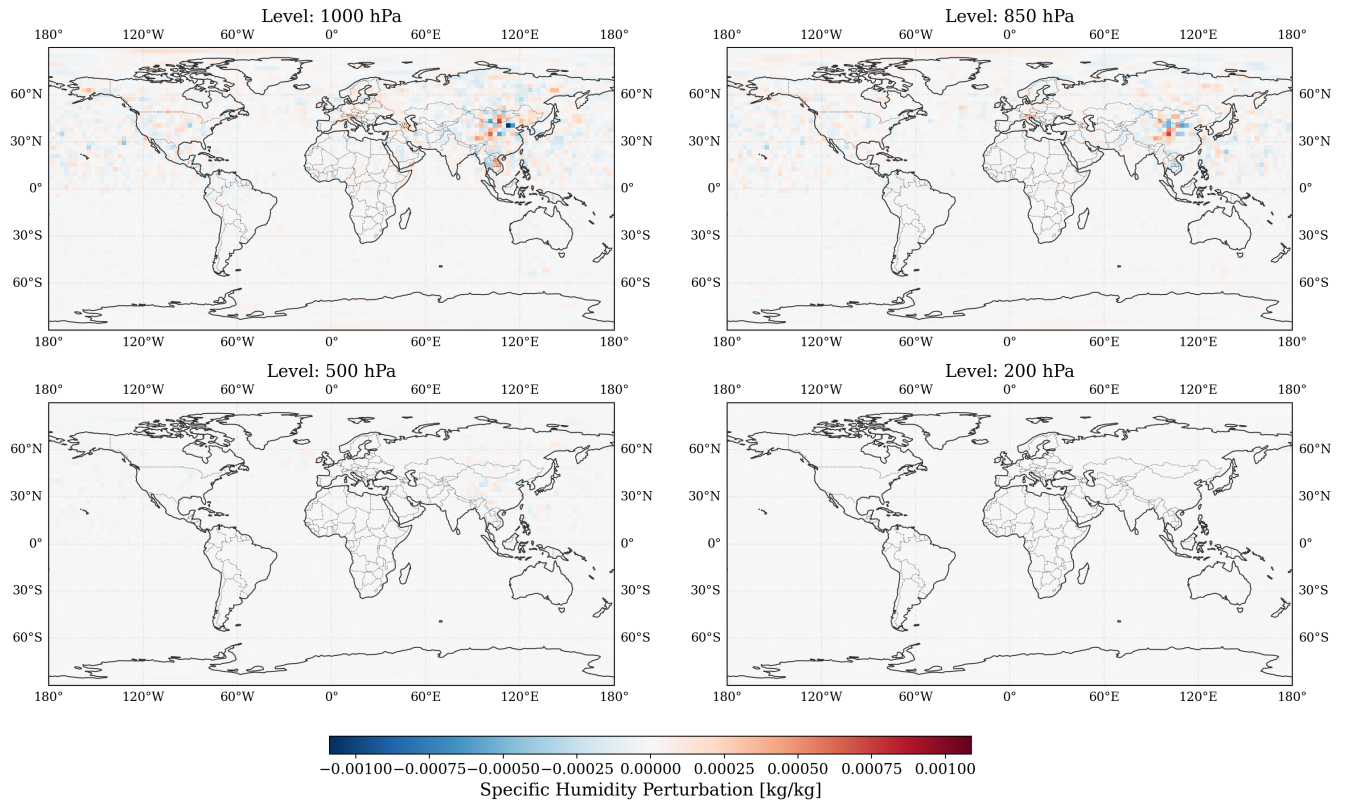

**Figure S4.** Spatial distribution of initial condition perturbations in specific humidity at four pressure levels (1000, 850, 500, and 200 hPa). The perturbations are primarily concentrated over Asia with lower levels having stronger perturbations

### Spatial Distribution: Temperature

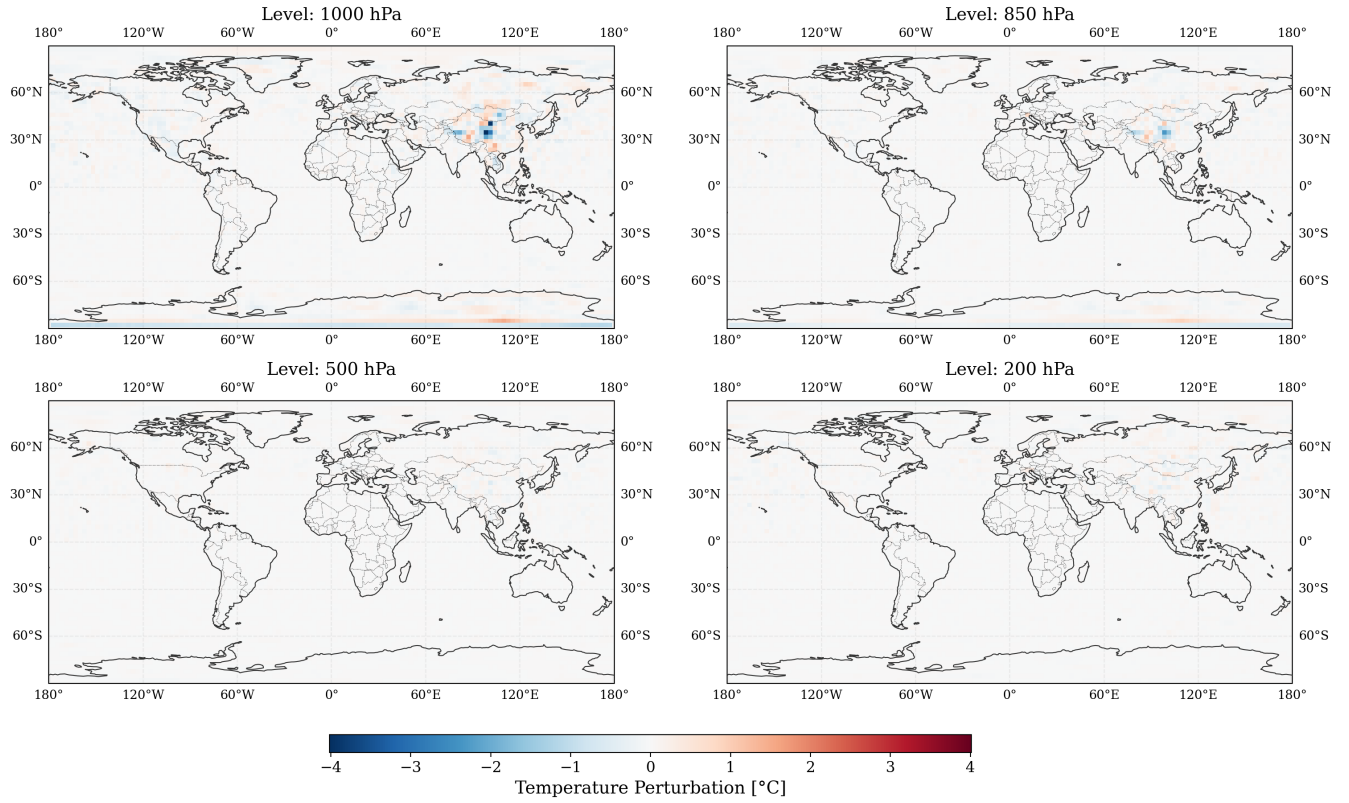

**Figure S5.** Spatial distribution of initial condition perturbations in temperature at four pressure levels (1000, 850, 500, and 200 hPa). The perturbations are primarily concentrated around Asia and stronger for the lower levels.
